# Supplementary material
Source: PubMed Central journal article supplement (PMC2077072)

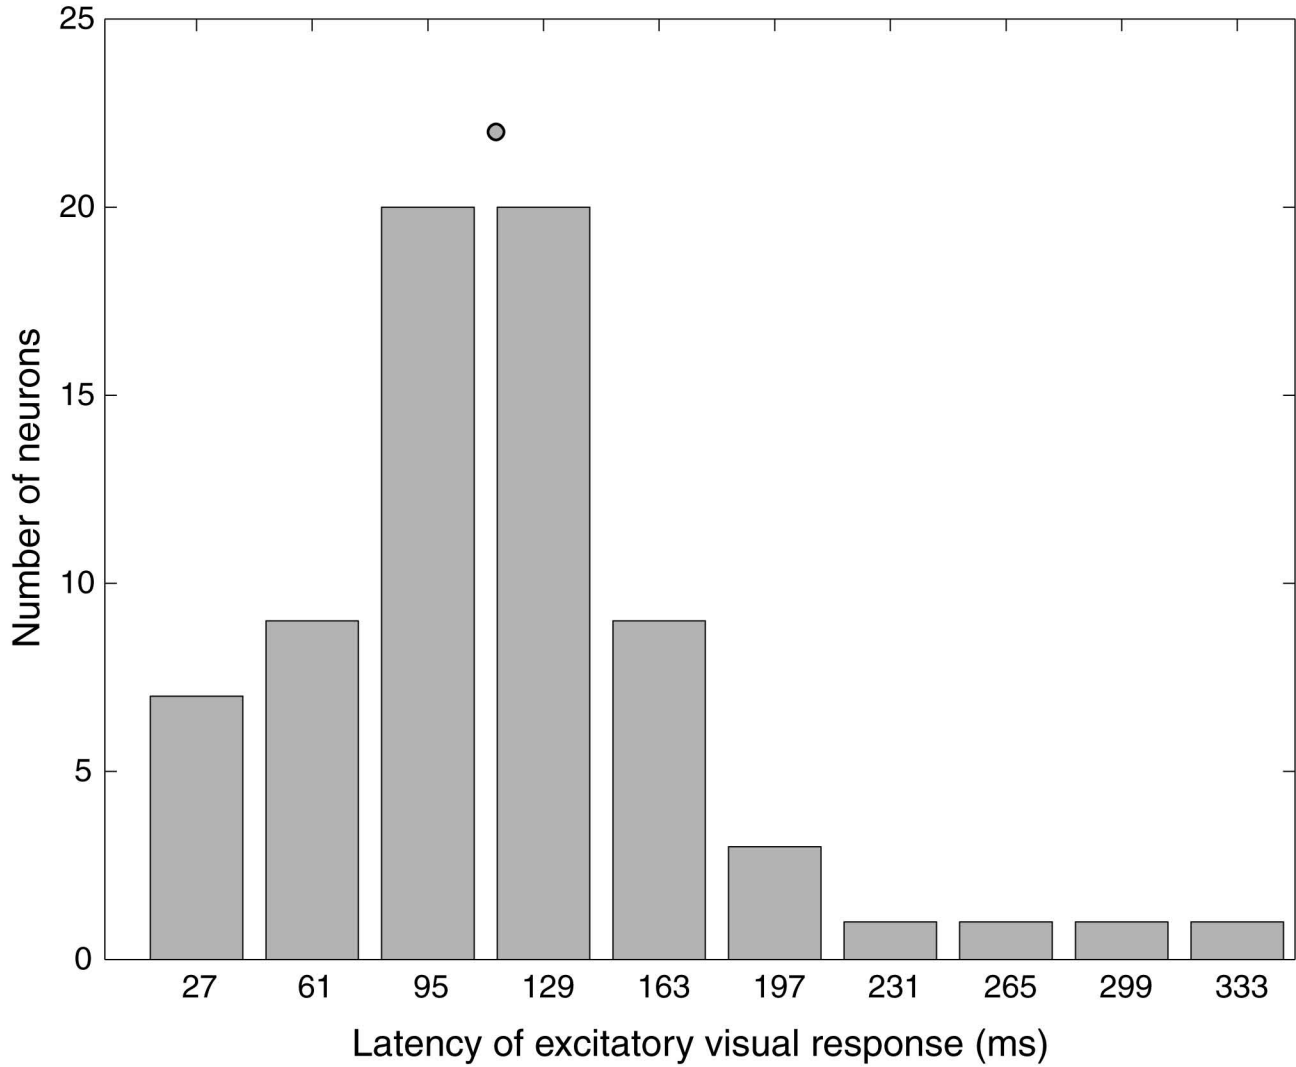

Supplement: pnas_0706249104_1.pdf [file pnas_0706249104_1.pdf]

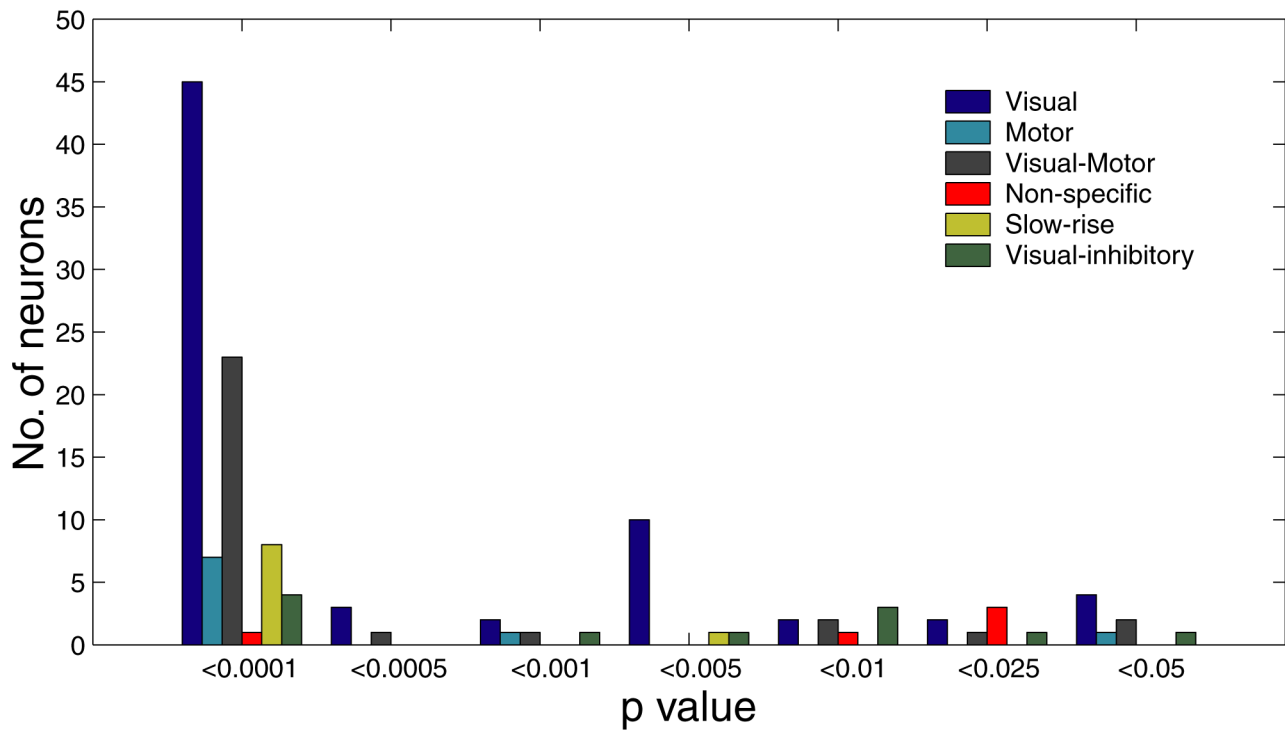

Supplement: pnas_0706249104_2.pdf [file pnas_0706249104_2.pdf]

**a**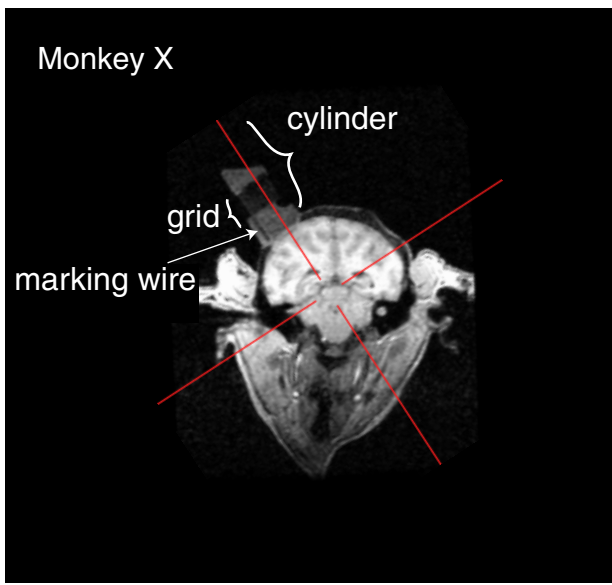**b**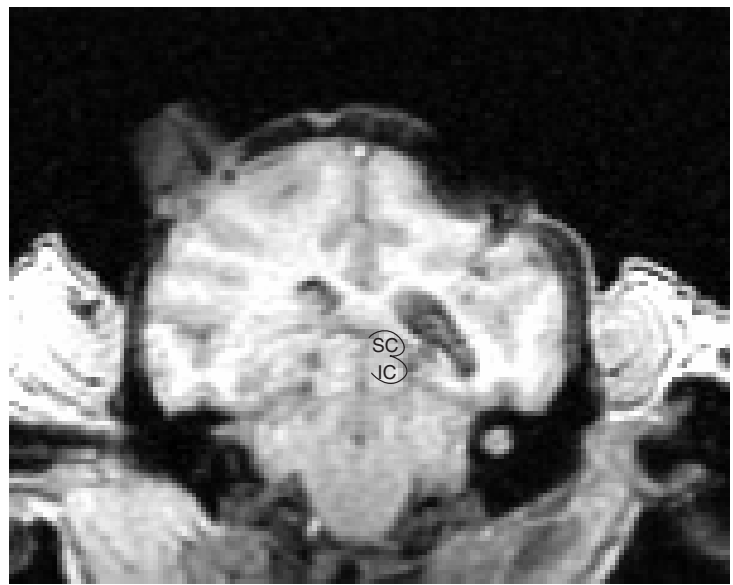**c**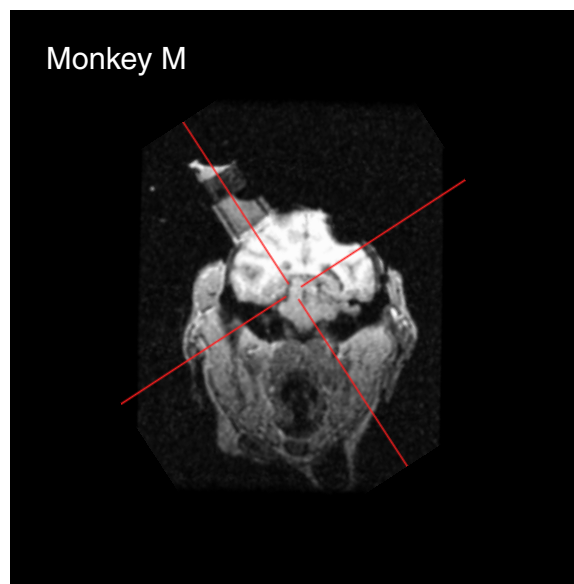**d**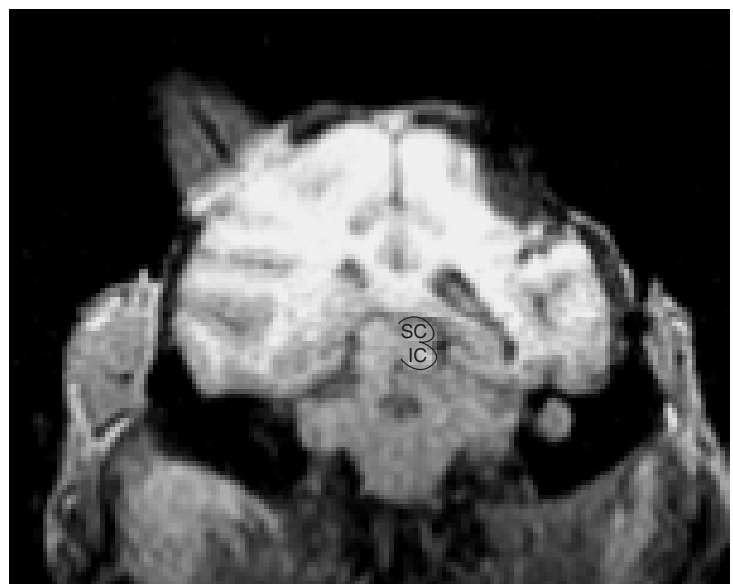**e**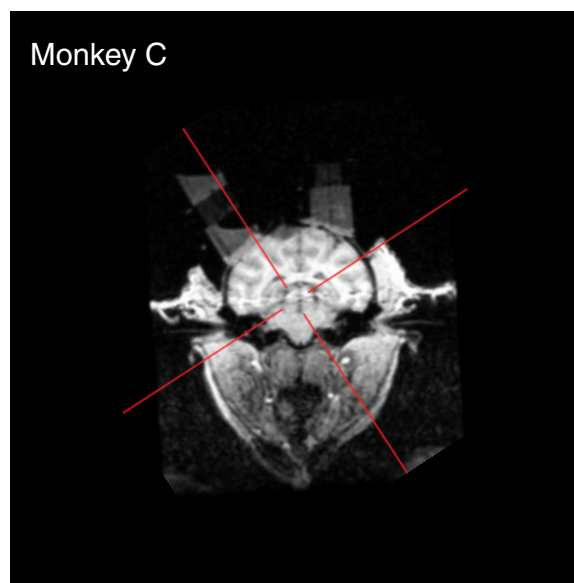**f**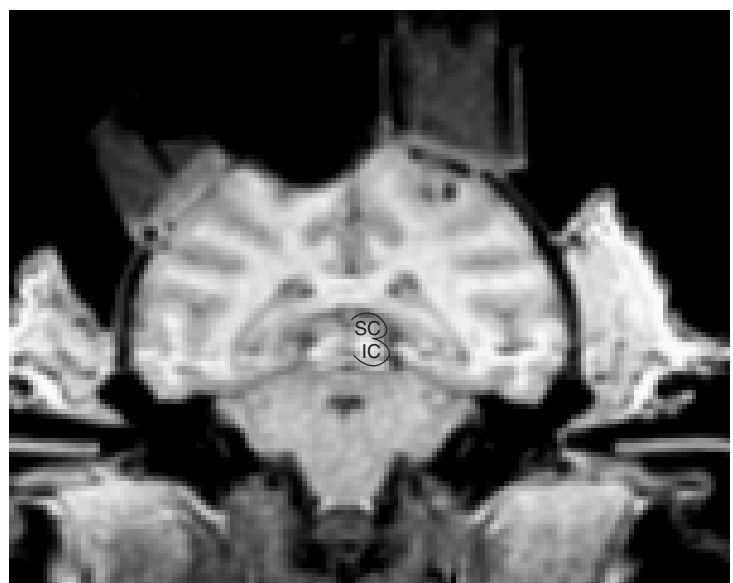

Supplement: pnas_0706249104_3.pdf [file pnas_0706249104_3.pdf]

**a**

Monkey X

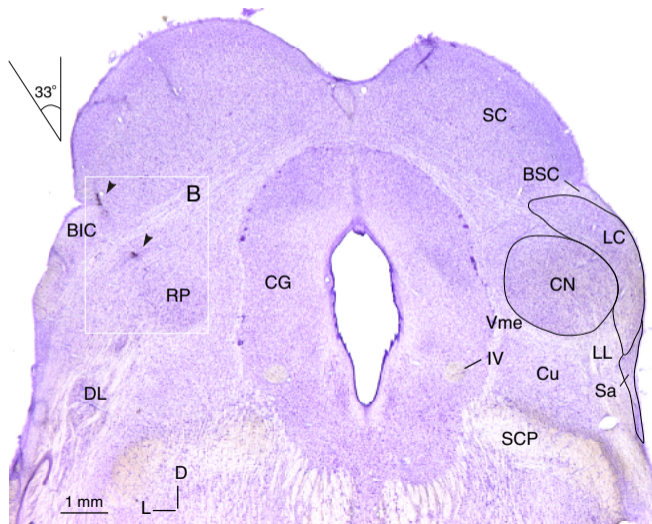**b**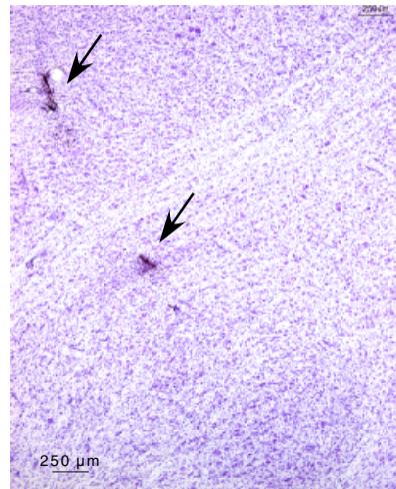

Supplement: pnas_0706249104_4.pdf [file pnas_0706249104_4.pdf]
